# Supplementary material for: Maternal and Perinatal Outcomes Associated With Extremely High Values for the sFlt‐1 (Soluble fms‐Like Tyrosine Kinase 1)/PlGF (Placental Growth Factor) Ratio
Source: PubMed Central journal article supplement — J Am Heart Assoc. 2020 Apr 4;9(7):e015548. doi: 10.1161/JAHA.119.015548 (PMC7428600; doi:10.1161/jaha.119.015548), 2020-04-04

# **SUPPLEMENTAL MATERIAL**

**Table S1. External analysis of the clinical decisions after knowledge of sFlt-1/PIGF > 655 according to the presence of preeclampsia at inclusion.**

| Clinical decisions after knowledge of sFlt-1/PIGF >655        | Total (n=237) | Preeclampsia at inclusion |             |       |
|---------------------------------------------------------------|---------------|---------------------------|-------------|-------|
|                                                               |               | No (n=52)                 | Yes (n=185) | p     |
| <b>Hospitalization</b>                                        |               |                           |             |       |
| - No                                                          | 30 (12.7)     | 15 (28.8)                 | 15 (8.1)    | <0.01 |
| - Previously hospitalized                                     | 149 (62.9)    | 19 (36.5)                 | 130 (70.3)  |       |
| - Yes, following current protocols                            | 44 (18.6)     | 11 (21.2)                 | 33 (17.8)   |       |
| - Yes, conditioned by the knowledge of the sFlt-1/PIGF        | 14 (5.9)      | 7 (13.5)                  | 7 (3.8)     |       |
| <b>Fetal maturation</b>                                       |               |                           |             |       |
| - No                                                          | 36 (15.2)     | 14 (26.9)                 | 22 (11.9)   | 0.02  |
| - Yes, previously indicated                                   | 146 (61.6)    | 25 (48.1)                 | 121 (65.4)  |       |
| - Yes, following current protocols                            | 41 (17.3)     | 8 (15.4)                  | 32 (17.3)   |       |
| - Yes, conditioned by the knowledge of the sFlt-1/PIGF        | 14 (5.9)      | 5 (9.6)                   | 6 (3.2)     |       |
| <b>Indication of delivery</b>                                 |               |                           |             |       |
| - Spontaneous onset of labor                                  | 2 (0.8)       | 0 (0)                     | 2 (0.1)     | 0.99  |
| - Iatrogenic, following current protocols                     | 212 (89.5)    | 47 (90.4)                 | 165 (89.2)  |       |
| - Iatrogenic, conditioned by the knowledge of the sFlt-1/PIGF | 23 (9.7)      | 5 (9.6)                   | 18 (9.7)    |       |
| <b>Overall adequacy</b>                                       |               |                           |             |       |
| - Correct, according to current protocols                     | 205 (86.5)    | 41 (78.8)                 | 164 (88.6)  | 0.22  |
| - Correct but not following current protocols                 | 20 (8.4)      | 8 (15.4)                  | 12 (6.5)    |       |
| - Incorrect                                                   | 7 (3.0)       | 2 (3.8)                   | 5 (2.7)     |       |
| - Unable to establish                                         | 5 (2.1)       | 1 (1.9)                   | 4 (2.2)     |       |

**Figure S1. Time until delivery according to the presence of PE at inclusion or its subsequent development.**

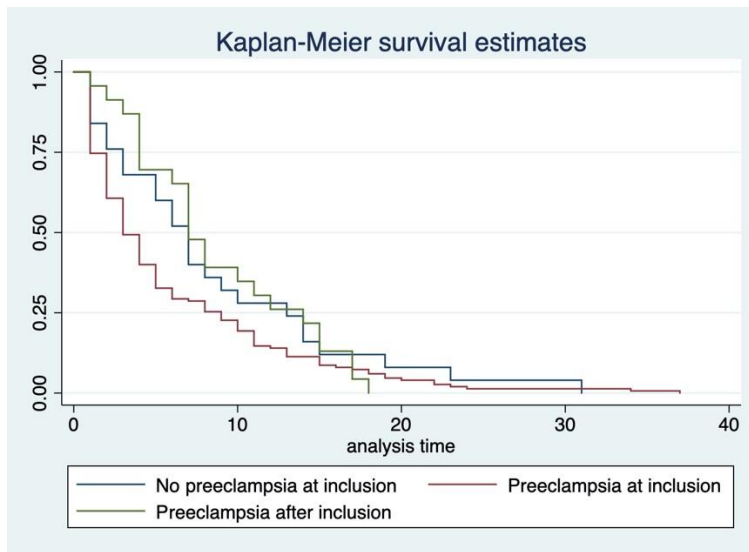

Supplement: JAH3-9-e015548-s001.pdf [file JAH3-9-e015548-s001.pdf]
